# Supplementary material
Source: MDPI journal article supplement (https://www.mdpi.com/2813-1851/2/1/1)
Supplement: s1 [file s1]

# In Silico Infrared Spectroscopy as a Benchmark for Identifying Seized Samples Suspected of being N-Ethylpentylone

Caio H. P. Rodrigues, Ricardo de O. Mascarenhas, and Aline T. Bruni

**Table S1.** Name and code of amphetamines and cathinones used in this work for designing the PLS-DA models.

| Code | Name                                                                     |
|------|--------------------------------------------------------------------------|
| c01  | Cathinone                                                                |
| c02  | 2-Methylamino-1-phenyl-1-propanone                                       |
| c03  | 4-bromocathinone - 2-amino-1-(4-bromophenyl)-propanone                   |
| c04  | 2-amino-1-(4-fluorophenyl)-propanone                                     |
| c05  | 2-(methylamino)-1-phenylbutan-1-one                                      |
| c06  | 2-(methylamino)-1-(4-methylphenyl)propan-1-one                           |
| c07  | 1-(4-ethylphenyl)-2-(methylamino)propan-1-one                            |
| c08  | 1-(4-methoxyphenyl)-2-(methylamino)propan-1-one                          |
| c09  | 1-(1,3-benzodioxol-5-yl)-2-(methylamino)propan-1-one                     |
| c10  | 1-(1,3-Benzodioxol-5-yl)-2-(methylamino)butan-1-one                      |
| c11  | 1-(4-fluorophenyl)-2-methylaminopropan-1-one                             |
| c12  | 2-(ethylamino)-1-phenylpropan-1-one                                      |
| c13  | 2-(ethylamino)-1-(4-methylphenyl)propan-1-one                            |
| c14  | 1-(1,3-benzodioxol-5-yl)-2-(ethylamino)propan-1-one                      |
| c15  | 1-(1,3-benzodioxol-5-yl)-2-(ethylamino)butan-1-one                       |
| c16  | alpha-pyrrolidinopentiophenone - 1-phenyl-2-(1-pyrrolidinyl)-1-pentanone |
| c17  | 1-(4-methylphenyl)-2-(pyrrolidin-1-yl)pentan-1-one                       |
| c18  | 1-(1,3-benzodioxol-5-yl)-2-(pyrrolidin-1-yl)propan-1-one                 |
| c19  | 1-(1,3-benzodioxol-5-yl)-2-(1-pyrrolidinyl)-1-butanone                   |
| c20  | 1-(1,3-benzodioxol-5-yl)-2-(pyrrolidin-1-yl)pentan-1-one                 |
| c21  | 1-(naphthalen-2-yl)-2-(pyrrolidin-1-yl)pentan-1-one                      |
| a01  | Amphetamine                                                              |
| a02  | Methamphetamine                                                          |
| a03  | 1-(4-bromophenyl)propan-2-amine                                          |
| a04  | 1-(4-fluorophenyl)propan-2-amine                                         |
| a05  | N-methyl-1-phenylpentan-2-amine                                          |
| a06  | N-methyl-1-(4-methylphenyl)propan-2-amine                                |
| a07  | 1-(4-ethylphenyl)-N-methylpropan-2-amine                                 |
| a08  | 1-(4-methoxyphenyl)-N-methylpropan-2-amine                               |
| a09  | 3,4-Methylenedioxymethamphetamine                                        |
| a10  | 1-(2 <i>H</i> -1,3-benzodioxol-5-yl)-N-methylbutan-2-amine               |
| a11  | 1-(4-fluorophenyl)-N-methylpropan-2-amine                                |
| a12  | N-ethyl-1-phenylpropan-2-amine                                           |
| a13  | N-ethyl-1-(4-methylphenyl)propan-2-amine                                 |
| a14  | 1-(2 <i>H</i> -1,3-benzodioxol-5-yl)-N-ethylpropan-2-amine               |
| a15  | 1-(2 <i>H</i> -1,3-benzodioxol-5-yl)-N-ethylbutan-2-amine                |
| a16  | 1-(1-phenylpentan-2-yl)pyrrolidine                                       |
| a17  | 1-[1-(4-methylphenyl)pentan-2-yl]pyrrolidine                             |
| a18  | 1-[1-(2 <i>H</i> -1,3-benzodioxol-5-yl)propan-2-yl]pyrrolidine           |
| a19  | 1-[1-(2 <i>H</i> -1,3-benzodioxol-5-yl)butan-2-yl]pyrrolidine            |
| a20  | 1-[1-(2 <i>H</i> -1,3-benzodioxol-5-yl)pentan-2-yl]pyrrolidine           |
| a21  | 1-[1-(naphthalen-2-yl)pentan-2-yl]pyrrolidine                            |

**Table S2.** 20 amphetamines and 20 cathinones available on the SWGDRUG library of monographs.

| Code | Name                                                    |
|------|---------------------------------------------------------|
| cm01 | Butylone HCl                                            |
| cm02 | Ethylethcathinone HCl                                   |
| cm03 | 4-Fluoroisocathinone HCl                                |
| cm04 | 3,4-Methylenedioxypropyrolone HCl                       |
| cm05 | 4-methyl-alpha-pyrrolidinopropiophenone HCl             |
| cm06 | 4-Fluoromethcathinone HCl                               |
| cm07 | 3-Ethylmethcathinone HCl                                |
| cm08 | Cathinone HCl                                           |
| cm09 | 2,4-Dimethylmethcathinone HCl                           |
| cm10 | 4-Bromomethcathinone HCl                                |
| cm11 | alpha-PVP HCl                                           |
| cm12 | N-tert-Butyl-3,4-methylenedioxcathinone HCl             |
| cm13 | N-Propyl-3,4-methylenedioxcathinone HCl                 |
| cm14 | alpha-PPP HCl                                           |
| cm15 | N-Ethylpentylone HCl                                    |
| cm16 | 2,3-MDMA HCl                                            |
| cm17 | 4-Methoxy-PVP HCl                                       |
| cm18 | Pentylone HCl                                           |
| cm19 | d,l-Methcathinone HCl                                   |
| cm20 | 4-methylmethcathinone HCl                               |
| am01 | 2,5-Dimethoxyamphetamine HCl                            |
| am02 | 2,5-Dimethoxy-4-Chloro-amphetamine HCl                  |
| am03 | 4-Fluoroamphetamine HCl                                 |
| am04 | 3-Fluoromethamphetamine HCl                             |
| am05 | d,l-4-Bromo-2,5-dimethoxyamphetamine HCl                |
| am06 | 3,4-Dimethoxyamphetamine HCl                            |
| am07 | N-ethylamphetamine HCl                                  |
| am08 | 4-Methylamphetamine HCl                                 |
| am09 | N-Butylamphetamine HCl                                  |
| am10 | N-Ethyl-4-methoxyamphetamine HCl                        |
| am11 | 3,4-Methylenedioxymethamphetamine methylene homolog HCl |
| am12 | d-Methamphetamine HCl                                   |
| am13 | N,N-Dimethylamphetamine HCl                             |
| am14 | N-(2-Methoxyethyl)-3,4-methylenedioxyamphetamine HCl    |
| am15 | 3,4-methylenedioxyethylamphetamine HCl (MDEA)           |
| am16 | N-Hydroxy-3,4-methylenedioxyamphetamine HCl             |
| am17 | 2-Methoxymethamphetamine HCl                            |
| am18 | 3,4-methylenedioxyamphetamine HCl                       |
| am19 | para-Methoxymethamphetamine HCl                         |
| am20 | 3,4-methylenedioxymethylamphetamine HCl                 |

**Table S3.** 20 adulterants available on the SWGDRUG library of monographs.

| <b>Code</b> | <b>Name</b>            |
|-------------|------------------------|
| dm01        | Pregabalin             |
| dm02        | Aspirin                |
| dm03        | Hydrated creatine      |
| dm04        | Ibuprofen              |
| dm05        | Nicotinamide           |
| dm06        | Phenacetin             |
| dm07        | Diphenhydramine HCl    |
| dm08        | Paracetamol            |
| dm09        | Dihydrated Quinine HCl |
| dm10        | Caffeine               |
| dm11        | Levamisol HCl          |
| dm12        | Sildenafil citrate     |
| dm13        | Papaverine HCl         |
| dm14        | Inositol               |
| dm15        | Naproxen               |
| dm16        | Thiamine HCl           |
| dm17        | Promethazine HCl       |
| dm18        | Guaifenesin            |
| dm19        | Melatonin              |
| dm20        | Dipyrone               |

**Table S4.** Numerical values obtained by Pearson's correlation for samples evaluated experimentally.

|          | SWGDRUG | 2160 | 2163 | 2167 | 2168 | 2174 | 2176 | 2177 | 2178 | 2180 | 2181A | 2181B | 2184A | 2184B | 2221 | 2177 | 2225 | 2228 | 2229 | 2230 | 2231 | 2232 | 2233 | 2234 |
|----------|---------|------|------|------|------|------|------|------|------|------|-------|-------|-------|-------|------|------|------|------|------|------|------|------|------|------|
| SW-GDRUG | 1.00    |      |      |      |      |      |      |      |      |      |       |       |       |       |      |      |      |      |      |      |      |      |      |      |
| 2160     | 0.09    | 1.00 |      |      |      |      |      |      |      |      |       |       |       |       |      |      |      |      |      |      |      |      |      |      |
| 2163     | 0.74    | 0.56 | 1.00 |      |      |      |      |      |      |      |       |       |       |       |      |      |      |      |      |      |      |      |      |      |
| 2167     | 0.73    | 0.60 | 1.00 | 1.00 |      |      |      |      |      |      |       |       |       |       |      |      |      |      |      |      |      |      |      |      |
| 2168     | 0.74    | 0.52 | 1.00 | 0.99 | 1.00 |      |      |      |      |      |       |       |       |       |      |      |      |      |      |      |      |      |      |      |
| 2174     | 0.62    | 0.75 | 0.97 | 0.98 | 0.95 | 1.00 |      |      |      |      |       |       |       |       |      |      |      |      |      |      |      |      |      |      |
| 2176     | 0.78    | 0.49 | 0.99 | 0.99 | 0.99 | 0.94 | 1.00 |      |      |      |       |       |       |       |      |      |      |      |      |      |      |      |      |      |
| 2177     | 0.61    | 0.74 | 0.97 | 0.98 | 0.96 | 1.00 | 0.94 | 1.00 |      |      |       |       |       |       |      |      |      |      |      |      |      |      |      |      |
| 2178     | 0.65    | 0.69 | 0.98 | 0.99 | 0.97 | 1.00 | 0.96 | 0.99 | 1.00 |      |       |       |       |       |      |      |      |      |      |      |      |      |      |      |
| 2180     | 0.67    | 0.66 | 0.99 | 0.99 | 0.98 | 0.99 | 0.97 | 0.99 | 1.00 | 1.00 |       |       |       |       |      |      |      |      |      |      |      |      |      |      |
| 2181A    | 0.68    | 0.66 | 0.99 | 0.99 | 0.98 | 0.99 | 0.98 | 0.99 | 1.00 | 1.00 | 1.00  |       |       |       |      |      |      |      |      |      |      |      |      |      |
| 2181B    | 0.45    | 0.90 | 0.86 | 0.88 | 0.84 | 0.96 | 0.82 | 0.96 | 0.93 | 0.92 | 0.92  | 1.00  |       |       |      |      |      |      |      |      |      |      |      |      |
| 2184A    | 0.72    | 0.58 | 0.99 | 0.99 | 0.98 | 0.97 | 0.98 | 0.97 | 0.99 | 0.99 | 0.99  | 0.88  | 1.00  |       |      |      |      |      |      |      |      |      |      |      |
| 2184B    | 0.27    | 0.97 | 0.73 | 0.76 | 0.69 | 0.87 | 0.67 | 0.87 | 0.83 | 0.81 | 0.81  | 0.97  | 0.75  | 1.00  |      |      |      |      |      |      |      |      |      |      |
| 2221     | 0.36    | 0.94 | 0.80 | 0.82 | 0.77 | 0.92 | 0.75 | 0.92 | 0.88 | 0.87 | 0.86  | 0.98  | 0.81  | 0.98  | 1.00 |      |      |      |      |      |      |      |      |      |
| 2177     | 0.61    | 0.74 | 0.97 | 0.98 | 0.96 | 1.00 | 0.94 | 1.00 | 0.99 | 0.99 | 0.99  | 0.96  | 0.97  | 0.87  | 0.92 | 1.00 |      |      |      |      |      |      |      |      |
| 2225     | 0.47    | 0.88 | 0.87 | 0.89 | 0.85 | 0.96 | 0.83 | 0.96 | 0.93 | 0.92 | 0.92  | 0.98  | 0.87  | 0.95  | 0.98 | 0.96 | 1.00 |      |      |      |      |      |      |      |
| 2228     | 0.09    | 0.99 | 0.57 | 0.60 | 0.53 | 0.75 | 0.50 | 0.75 | 0.68 | 0.66 | 0.66  | 0.89  | 0.57  | 0.96  | 0.94 | 0.75 | 0.89 | 1.00 |      |      |      |      |      |      |
| 2229     | 0.64    | 0.71 | 0.97 | 0.98 | 0.97 | 0.99 | 0.96 | 0.99 | 0.99 | 0.99 | 0.99  | 0.93  | 0.96  | 0.84  | 0.90 | 0.99 | 0.95 | 0.72 | 1.00 |      |      |      |      |      |
| 2230     | 0.20    | 0.99 | 0.65 | 0.68 | 0.62 | 0.82 | 0.59 | 0.81 | 0.76 | 0.74 | 0.74  | 0.93  | 0.66  | 0.98  | 0.97 | 0.81 | 0.93 | 0.99 | 0.79 | 1.00 |      |      |      |      |
| 2231     | 0.67    | 0.66 | 0.99 | 0.99 | 0.98 | 0.99 | 0.97 | 0.99 | 1.00 | 1.00 | 1.00  | 0.92  | 0.98  | 0.81  | 0.87 | 0.99 | 0.92 | 0.66 | 0.99 | 0.74 | 1.00 |      |      |      |
| 2232     | 0.59    | 0.77 | 0.96 | 0.96 | 0.94 | 1.00 | 0.93 | 1.00 | 0.99 | 0.98 | 0.98  | 0.96  | 0.95  | 0.89  | 0.94 | 1.00 | 0.97 | 0.78 | 0.99 | 0.84 | 0.98 | 1.00 |      |      |
| 2233     | 0.32    | 0.95 | 0.77 | 0.80 | 0.74 | 0.90 | 0.72 | 0.90 | 0.86 | 0.85 | 0.84  | 0.98  | 0.78  | 0.99  | 1.00 | 0.90 | 0.98 | 0.96 | 0.88 | 0.98 | 0.85 | 0.92 | 1.00 |      |
| 2234     | 0.72    | 0.59 | 1.00 | 1.00 | 0.99 | 0.98 | 0.99 | 0.98 | 0.99 | 0.99 | 0.99  | 0.88  | 0.98  | 0.75  | 0.82 | 0.98 | 0.89 | 0.60 | 0.98 | 0.68 | 0.99 | 0.96 | 0.80 | 1.00 |
| 2235     | 0.56    | 0.79 | 0.94 | 0.94 | 0.92 | 0.98 | 0.91 | 0.99 | 0.97 | 0.97 | 0.96  | 0.96  | 0.93  | 0.90  | 0.95 | 0.99 | 0.98 | 0.80 | 0.99 | 0.86 | 0.97 | 0.99 | 0.93 | 0.95 |
| 2236A    | 0.76    | 0.54 | 0.99 | 0.99 | 0.99 | 0.96 | 1.00 | 0.96 | 0.98 | 0.98 | 0.99  | 0.85  | 0.99  | 0.71  | 0.78 | 0.96 | 0.85 | 0.53 | 0.96 | 0.62 | 0.98 | 0.94 | 0.75 | 0.99 |
| 2236B    | 0.76    | 0.54 | 1.00 | 0.99 | 1.00 | 0.96 | 1.00 | 0.96 | 0.98 | 0.99 | 0.99  | 0.85  | 0.99  | 0.71  | 0.78 | 0.96 | 0.86 | 0.54 | 0.97 | 0.63 | 0.98 | 0.95 | 0.75 | 0.99 |
| 2237     | 0.49    | 0.84 | 0.89 | 0.91 | 0.87 | 0.97 | 0.86 | 0.96 | 0.96 | 0.94 | 0.94  | 0.98  | 0.92  | 0.94  | 0.95 | 0.96 | 0.95 | 0.82 | 0.94 | 0.88 | 0.94 | 0.96 | 0.94 | 0.90 |
| 2238A    | 0.57    | 0.80 | 0.94 | 0.96 | 0.93 | 1.00 | 0.92 | 0.99 | 0.98 | 0.98 | 0.98  | 0.98  | 0.95  | 0.91  | 0.95 | 0.99 | 0.98 | 0.80 | 0.98 | 0.86 | 0.98 | 1.00 | 0.93 | 0.95 |
| 2238B    | 0.67    | 0.67 | 0.99 | 0.99 | 0.98 | 0.99 | 0.97 | 0.99 | 1.00 | 1.00 | 1.00  | 0.92  | 0.99  | 0.81  | 0.87 | 0.99 | 0.92 | 0.67 | 0.99 | 0.74 | 1.00 | 0.98 | 0.85 | 0.99 |
| 2239     | 0.67    | 0.67 | 0.99 | 0.99 | 0.98 | 0.99 | 0.97 | 0.99 | 1.00 | 0.99 | 1.00  | 0.92  | 0.98  | 0.81  | 0.87 | 0.99 | 0.93 | 0.67 | 0.99 | 0.75 | 1.00 | 0.98 | 0.85 | 0.99 |
| 2240     | 0.72    | 0.60 | 1.00 | 0.99 | 0.99 | 0.98 | 0.99 | 0.98 | 0.99 | 0.99 | 0.99  | 0.88  | 0.99  | 0.75  | 0.83 | 0.98 | 0.89 | 0.60 | 0.98 | 0.68 | 0.99 | 0.97 | 0.80 | 0.99 |
| 2265     | 0.65    | 0.71 | 0.98 | 0.99 | 0.97 | 1.00 | 0.96 | 1.00 | 1.00 | 1.00 | 1.00  | 0.94  | 0.98  | 0.84  | 0.89 | 1.00 | 0.94 | 0.71 | 0.99 | 0.78 | 0.99 | 0.99 | 0.88 | 0.98 |
| 2266     | 0.70    | 0.64 | 0.99 | 1.00 | 0.98 | 0.99 | 0.98 | 0.99 | 0.99 | 0.99 | 1.00  | 0.90  | 0.98  | 0.79  | 0.85 | 0.99 | 0.91 | 0.64 | 0.99 | 0.72 | 1.00 | 0.98 | 0.83 | 1.00 |
| 2267     | 0.68    | 0.68 | 0.98 | 0.99 | 0.97 | 0.99 | 0.97 | 0.99 | 1.00 | 1.00 | 1.00  | 0.93  | 0.99  | 0.82  | 0.88 | 0.99 | 0.93 | 0.68 | 0.99 | 0.75 | 0.99 | 0.98 | 0.86 | 0.99 |
| 2269     | 0.75    | 0.55 | 1.00 | 1.00 | 1.00 | 0.97 | 1.00 | 0.97 | 0.98 | 0.99 | 0.99  | 0.86  | 0.99  | 0.72  | 0.79 | 0.97 | 0.87 | 0.56 | 0.97 | 0.64 | 0.99 | 0.95 | 0.77 | 1.00 |
| 2269B    | 0.57    | 0.80 | 0.94 | 0.95 | 0.92 | 0.99 | 0.91 | 0.99 | 0.98 | 0.97 | 0.97  | 0.98  | 0.94  | 0.91  | 0.95 | 0.99 | 0.98 | 0.81 | 0.99 | 0.87 | 0.97 | 1.00 | 0.94 | 0.95 |
| 2269C    | 0.39    | 0.93 | 0.81 | 0.83 | 0.78 | 0.92 | 0.76 | 0.92 | 0.89 | 0.87 | 0.87  | 0.98  | 0.81  | 0.98  | 1.00 | 0.92 | 0.98 | 0.93 | 0.91 | 0.97 | 0.87 | 0.94 | 0.99 | 0.83 |
| 2269D    | 0.44    | 0.88 | 0.87 | 0.89 | 0.84 | 0.96 | 0.82 | 0.96 | 0.93 | 0.92 | 0.92  | 0.98  | 0.86  | 0.96  | 0.98 | 0.96 | 0.99 | 0.89 | 0.94 | 0.93 | 0.92 | 0.97 | 0.98 | 0.89 |
| 2269E    | 0.64    | 0.71 | 0.98 | 0.99 | 0.96 | 1.00 | 0.96 | 1.00 | 1.00 | 0.99 | 1.00  | 0.94  | 0.98  | 0.85  | 0.90 | 1.00 | 0.95 | 0.71 | 0.99 | 0.79 | 0.99 | 0.99 | 0.88 | 0.98 |

|       |      |      |      |      |      |      |      |      |      |      |      |      |      |      |      |      |      |      |      |      |      |      |      |      |
|-------|------|------|------|------|------|------|------|------|------|------|------|------|------|------|------|------|------|------|------|------|------|------|------|------|
| 2270  | 0.75 | 0.55 | 1.00 | 0.99 | 1.00 | 0.96 | 0.99 | 0.96 | 0.97 | 0.98 | 0.98 | 0.85 | 0.98 | 0.71 | 0.79 | 0.96 | 0.86 | 0.56 | 0.97 | 0.64 | 0.99 | 0.95 | 0.76 | 0.99 |
| 2271  | 0.63 | 0.72 | 0.98 | 0.98 | 0.96 | 1.00 | 0.95 | 1.00 | 1.00 | 0.99 | 0.99 | 0.95 | 0.97 | 0.85 | 0.91 | 1.00 | 0.95 | 0.73 | 0.99 | 0.80 | 0.99 | 1.00 | 0.89 | 0.98 |
| 2273  | 0.76 | 0.50 | 0.99 | 0.99 | 1.00 | 0.94 | 1.00 | 0.95 | 0.96 | 0.97 | 0.97 | 0.82 | 0.98 | 0.67 | 0.76 | 0.95 | 0.84 | 0.51 | 0.96 | 0.60 | 0.98 | 0.93 | 0.73 | 0.99 |
| 2274  | 0.78 | 0.44 | 0.99 | 0.97 | 0.99 | 0.92 | 0.99 | 0.92 | 0.94 | 0.96 | 0.95 | 0.78 | 0.96 | 0.62 | 0.71 | 0.92 | 0.80 | 0.45 | 0.94 | 0.54 | 0.96 | 0.90 | 0.68 | 0.98 |
| 2275  | 0.71 | 0.65 | 0.98 | 0.98 | 0.97 | 0.98 | 0.97 | 0.98 | 0.98 | 0.99 | 0.98 | 0.90 | 0.97 | 0.79 | 0.86 | 0.98 | 0.92 | 0.66 | 0.99 | 0.74 | 0.99 | 0.98 | 0.84 | 0.98 |
| 2276A | 0.79 | 0.39 | 0.97 | 0.96 | 0.99 | 0.90 | 0.99 | 0.90 | 0.92 | 0.94 | 0.94 | 0.75 | 0.96 | 0.58 | 0.68 | 0.90 | 0.77 | 0.41 | 0.92 | 0.50 | 0.94 | 0.88 | 0.64 | 0.96 |
| 2276B | 0.75 | 0.52 | 1.00 | 0.99 | 1.00 | 0.95 | 0.99 | 0.95 | 0.97 | 0.98 | 0.98 | 0.84 | 0.98 | 0.69 | 0.77 | 0.95 | 0.85 | 0.53 | 0.97 | 0.61 | 0.98 | 0.94 | 0.74 | 0.99 |
| 2277B | 0.72 | 0.61 | 0.99 | 1.00 | 0.99 | 0.98 | 0.99 | 0.98 | 0.99 | 1.00 | 1.00 | 0.90 | 0.99 | 0.77 | 0.83 | 0.98 | 0.89 | 0.61 | 0.98 | 0.70 | 0.99 | 0.97 | 0.81 | 0.99 |
| 2279  | 0.69 | 0.67 | 0.98 | 0.99 | 0.97 | 0.99 | 0.97 | 0.99 | 0.99 | 0.99 | 0.99 | 0.92 | 0.98 | 0.81 | 0.87 | 0.99 | 0.93 | 0.67 | 0.99 | 0.75 | 0.99 | 0.98 | 0.85 | 0.99 |
| 2280  | 0.76 | 0.52 | 0.99 | 0.99 | 1.00 | 0.96 | 1.00 | 0.96 | 0.97 | 0.98 | 0.98 | 0.84 | 0.99 | 0.70 | 0.77 | 0.96 | 0.85 | 0.52 | 0.96 | 0.62 | 0.98 | 0.94 | 0.74 | 0.99 |
| 2282  | 0.71 | 0.60 | 1.00 | 1.00 | 0.99 | 0.98 | 0.99 | 0.98 | 0.99 | 0.99 | 0.99 | 0.89 | 0.99 | 0.76 | 0.83 | 0.98 | 0.89 | 0.61 | 0.98 | 0.69 | 1.00 | 0.97 | 0.80 | 1.00 |
| 2284A | 0.71 | 0.60 | 1.00 | 1.00 | 0.99 | 0.98 | 0.99 | 0.98 | 0.99 | 0.99 | 0.99 | 0.89 | 0.99 | 0.76 | 0.83 | 0.98 | 0.89 | 0.61 | 0.98 | 0.69 | 1.00 | 0.97 | 0.80 | 1.00 |
| 2284B | 0.74 | 0.54 | 0.99 | 0.99 | 1.00 | 0.96 | 1.00 | 0.96 | 0.97 | 0.98 | 0.98 | 0.85 | 0.99 | 0.70 | 0.78 | 0.96 | 0.86 | 0.54 | 0.97 | 0.63 | 0.98 | 0.94 | 0.75 | 0.99 |
| 2288  | 0.71 | 0.61 | 0.99 | 1.00 | 0.99 | 0.98 | 0.99 | 0.98 | 0.99 | 1.00 | 1.00 | 0.90 | 1.00 | 0.77 | 0.83 | 0.98 | 0.89 | 0.61 | 0.98 | 0.70 | 0.99 | 0.97 | 0.81 | 0.99 |
| 2289  | 0.78 | 0.45 | 0.98 | 0.98 | 0.99 | 0.93 | 1.00 | 0.93 | 0.95 | 0.96 | 0.96 | 0.79 | 0.98 | 0.63 | 0.72 | 0.93 | 0.80 | 0.45 | 0.94 | 0.55 | 0.96 | 0.91 | 0.69 | 0.98 |
| 2293  | 0.60 | 0.75 | 0.96 | 0.97 | 0.95 | 1.00 | 0.93 | 0.99 | 0.99 | 0.98 | 0.98 | 0.95 | 0.96 | 0.87 | 0.92 | 0.99 | 0.96 | 0.75 | 0.99 | 0.82 | 0.99 | 0.99 | 0.90 | 0.97 |
| 2293B | 0.44 | 0.88 | 0.87 | 0.89 | 0.84 | 0.96 | 0.82 | 0.95 | 0.93 | 0.92 | 0.92 | 0.98 | 0.87 | 0.96 | 0.98 | 0.95 | 0.98 | 0.89 | 0.94 | 0.93 | 0.92 | 0.97 | 0.97 | 0.88 |
| 2297  | 0.72 | 0.61 | 0.99 | 1.00 | 0.99 | 0.98 | 0.99 | 0.98 | 0.99 | 1.00 | 1.00 | 0.89 | 0.99 | 0.77 | 0.84 | 0.98 | 0.90 | 0.61 | 0.98 | 0.70 | 1.00 | 0.97 | 0.81 | 0.99 |
| 2300  | 0.73 | 0.58 | 1.00 | 1.00 | 0.99 | 0.97 | 0.99 | 0.97 | 0.99 | 0.99 | 0.99 | 0.88 | 0.99 | 0.74 | 0.81 | 0.97 | 0.88 | 0.58 | 0.98 | 0.67 | 0.99 | 0.96 | 0.79 | 0.99 |
| 2357  | 0.71 | 0.62 | 0.99 | 1.00 | 0.99 | 0.98 | 0.99 | 0.98 | 0.99 | 1.00 | 1.00 | 0.90 | 0.99 | 0.77 | 0.84 | 0.98 | 0.90 | 0.62 | 0.98 | 0.70 | 1.00 | 0.97 | 0.81 | 0.99 |
| 2358  | 0.80 | 0.46 | 0.98 | 0.97 | 0.99 | 0.93 | 1.00 | 0.93 | 0.95 | 0.96 | 0.96 | 0.80 | 0.97 | 0.64 | 0.73 | 0.93 | 0.81 | 0.47 | 0.94 | 0.56 | 0.96 | 0.91 | 0.69 | 0.97 |
| 2372  | 0.61 | 0.73 | 0.97 | 0.98 | 0.95 | 1.00 | 0.95 | 0.99 | 0.99 | 0.99 | 0.99 | 0.95 | 0.97 | 0.86 | 0.91 | 0.99 | 0.94 | 0.73 | 0.98 | 0.80 | 0.99 | 0.99 | 0.89 | 0.97 |
| 2374  | 0.56 | 0.79 | 0.93 | 0.94 | 0.92 | 0.98 | 0.90 | 0.98 | 0.96 | 0.96 | 0.96 | 0.96 | 0.92 | 0.89 | 0.94 | 0.98 | 0.97 | 0.80 | 0.98 | 0.86 | 0.96 | 0.99 | 0.93 | 0.94 |
| 2376  | 0.70 | 0.66 | 0.99 | 0.99 | 0.98 | 0.99 | 0.98 | 0.99 | 0.99 | 1.00 | 0.99 | 0.92 | 0.98 | 0.81 | 0.87 | 0.99 | 0.93 | 0.67 | 0.99 | 0.75 | 1.00 | 0.98 | 0.85 | 0.99 |
| 2414  | 0.72 | 0.61 | 0.99 | 1.00 | 0.99 | 0.98 | 0.99 | 0.98 | 0.99 | 0.99 | 1.00 | 0.89 | 0.99 | 0.77 | 0.84 | 0.98 | 0.90 | 0.61 | 0.98 | 0.70 | 0.99 | 0.97 | 0.81 | 0.99 |
| 2417  | 0.73 | 0.59 | 1.00 | 1.00 | 0.99 | 0.98 | 0.99 | 0.98 | 0.99 | 0.99 | 0.99 | 0.88 | 0.99 | 0.75 | 0.82 | 0.98 | 0.88 | 0.59 | 0.98 | 0.68 | 0.99 | 0.96 | 0.79 | 1.00 |
| 2426  | 0.72 | 0.58 | 1.00 | 1.00 | 1.00 | 0.97 | 0.99 | 0.97 | 0.99 | 0.99 | 0.99 | 0.87 | 0.98 | 0.74 | 0.82 | 0.97 | 0.89 | 0.59 | 0.98 | 0.67 | 0.99 | 0.96 | 0.79 | 1.00 |
| 2429A | 0.73 | 0.55 | 1.00 | 0.99 | 1.00 | 0.96 | 0.99 | 0.97 | 0.98 | 0.99 | 0.99 | 0.86 | 0.98 | 0.72 | 0.80 | 0.97 | 0.87 | 0.56 | 0.98 | 0.65 | 0.99 | 0.95 | 0.77 | 0.99 |
| 2429B | 0.68 | 0.62 | 0.99 | 0.99 | 0.99 | 0.98 | 0.98 | 0.98 | 0.99 | 0.99 | 0.99 | 0.89 | 0.98 | 0.77 | 0.84 | 0.98 | 0.91 | 0.63 | 0.99 | 0.71 | 1.00 | 0.98 | 0.82 | 0.99 |

Table 4. *Cont.*

|       | 2235 | 2236A | 2236B | 2237 | 2238A | 2238B | 2239 | 2240 | 2265 | 2266 | 2267 | 2269 | 2269B | 2269C | 2269D | 2269E | 2270 | 2271 | 2273 | 2274 | 2275 | 2276A | 2276B | 2277B |
|-------|------|-------|-------|------|-------|-------|------|------|------|------|------|------|-------|-------|-------|-------|------|------|------|------|------|-------|-------|-------|
| SWG-  |      |       |       |      |       |       |      |      |      |      |      |      |       |       |       |       |      |      |      |      |      |       |       |       |
| DRUG  |      |       |       |      |       |       |      |      |      |      |      |      |       |       |       |       |      |      |      |      |      |       |       |       |
| 2160  |      |       |       |      |       |       |      |      |      |      |      |      |       |       |       |       |      |      |      |      |      |       |       |       |
| 2163  |      |       |       |      |       |       |      |      |      |      |      |      |       |       |       |       |      |      |      |      |      |       |       |       |
| 2167  |      |       |       |      |       |       |      |      |      |      |      |      |       |       |       |       |      |      |      |      |      |       |       |       |
| 2168  |      |       |       |      |       |       |      |      |      |      |      |      |       |       |       |       |      |      |      |      |      |       |       |       |
| 2174  |      |       |       |      |       |       |      |      |      |      |      |      |       |       |       |       |      |      |      |      |      |       |       |       |
| 2176  |      |       |       |      |       |       |      |      |      |      |      |      |       |       |       |       |      |      |      |      |      |       |       |       |
| 2177  |      |       |       |      |       |       |      |      |      |      |      |      |       |       |       |       |      |      |      |      |      |       |       |       |
| 2178  |      |       |       |      |       |       |      |      |      |      |      |      |       |       |       |       |      |      |      |      |      |       |       |       |
| 2180  |      |       |       |      |       |       |      |      |      |      |      |      |       |       |       |       |      |      |      |      |      |       |       |       |
| 2181A |      |       |       |      |       |       |      |      |      |      |      |      |       |       |       |       |      |      |      |      |      |       |       |       |
| 2181B |      |       |       |      |       |       |      |      |      |      |      |      |       |       |       |       |      |      |      |      |      |       |       |       |
| 2184A |      |       |       |      |       |       |      |      |      |      |      |      |       |       |       |       |      |      |      |      |      |       |       |       |
| 2184B |      |       |       |      |       |       |      |      |      |      |      |      |       |       |       |       |      |      |      |      |      |       |       |       |
| 2221  |      |       |       |      |       |       |      |      |      |      |      |      |       |       |       |       |      |      |      |      |      |       |       |       |
| 2177  |      |       |       |      |       |       |      |      |      |      |      |      |       |       |       |       |      |      |      |      |      |       |       |       |
| 2225  |      |       |       |      |       |       |      |      |      |      |      |      |       |       |       |       |      |      |      |      |      |       |       |       |
| 2228  |      |       |       |      |       |       |      |      |      |      |      |      |       |       |       |       |      |      |      |      |      |       |       |       |
| 2229  |      |       |       |      |       |       |      |      |      |      |      |      |       |       |       |       |      |      |      |      |      |       |       |       |
| 2230  |      |       |       |      |       |       |      |      |      |      |      |      |       |       |       |       |      |      |      |      |      |       |       |       |
| 2231  |      |       |       |      |       |       |      |      |      |      |      |      |       |       |       |       |      |      |      |      |      |       |       |       |
| 2232  |      |       |       |      |       |       |      |      |      |      |      |      |       |       |       |       |      |      |      |      |      |       |       |       |
| 2233  |      |       |       |      |       |       |      |      |      |      |      |      |       |       |       |       |      |      |      |      |      |       |       |       |
| 2234  |      |       |       |      |       |       |      |      |      |      |      |      |       |       |       |       |      |      |      |      |      |       |       |       |
| 2235  | 1.00 |       |       |      |       |       |      |      |      |      |      |      |       |       |       |       |      |      |      |      |      |       |       |       |
| 2236A | 0.92 | 1.00  |       |      |       |       |      |      |      |      |      |      |       |       |       |       |      |      |      |      |      |       |       |       |
| 2236B | 0.93 | 1.00  | 1.00  |      |       |       |      |      |      |      |      |      |       |       |       |       |      |      |      |      |      |       |       |       |
| 2237  | 0.96 | 0.89  | 0.89  | 1.00 |       |       |      |      |      |      |      |      |       |       |       |       |      |      |      |      |      |       |       |       |
| 2238A | 0.99 | 0.93  | 0.94  | 0.98 | 1.00  |       |      |      |      |      |      |      |       |       |       |       |      |      |      |      |      |       |       |       |
| 2238B | 0.97 | 0.98  | 0.98  | 0.95 | 0.98  | 1.00  |      |      |      |      |      |      |       |       |       |       |      |      |      |      |      |       |       |       |
| 2239  | 0.97 | 0.98  | 0.98  | 0.94 | 0.98  | 1.00  | 1.00 |      |      |      |      |      |       |       |       |       |      |      |      |      |      |       |       |       |
| 2240  | 0.95 | 0.99  | 1.00  | 0.91 | 0.96  | 0.99  | 0.99 | 1.00 |      |      |      |      |       |       |       |       |      |      |      |      |      |       |       |       |
| 2265  | 0.98 | 0.97  | 0.97  | 0.96 | 0.99  | 1.00  | 1.00 | 0.99 | 1.00 |      |      |      |       |       |       |       |      |      |      |      |      |       |       |       |
| 2266  | 0.96 | 0.98  | 0.99  | 0.93 | 0.97  | 1.00  | 1.00 | 0.99 | 0.99 | 1.00 |      |      |       |       |       |       |      |      |      |      |      |       |       |       |
| 2267  | 0.97 | 0.98  | 0.98  | 0.95 | 0.98  | 1.00  | 0.99 | 0.99 | 1.00 | 0.99 | 1.00 |      |       |       |       |       |      |      |      |      |      |       |       |       |
| 2269  | 0.93 | 1.00  | 1.00  | 0.89 | 0.94  | 0.99  | 0.99 | 1.00 | 0.98 | 0.99 | 0.98 | 1.00 |       |       |       |       |      |      |      |      |      |       |       |       |
| 2269B | 0.99 | 0.93  | 0.93  | 0.97 | 1.00  | 0.98  | 0.98 | 0.95 | 0.99 | 0.97 | 0.98 | 0.94 | 1.00  |       |       |       |      |      |      |      |      |       |       |       |
| 2269C | 0.95 | 0.79  | 0.79  | 0.95 | 0.95  | 0.87  | 0.88 | 0.83 | 0.90 | 0.86 | 0.89 | 0.80 | 0.95  | 1.00  |       |       |      |      |      |      |      |       |       |       |
| 2269D | 0.97 | 0.85  | 0.85  | 0.96 | 0.97  | 0.92  | 0.93 | 0.88 | 0.94 | 0.91 | 0.92 | 0.86 | 0.98  | 0.98  | 1.00  |       |      |      |      |      |      |       |       |       |

|       |      |      |      |      |      |      |      |      |      |      |      |      |      |      |      |      |      |      |      |      |      |      |      |      |  |  |  |  |  |  |  |  |  |  |
|-------|------|------|------|------|------|------|------|------|------|------|------|------|------|------|------|------|------|------|------|------|------|------|------|------|--|--|--|--|--|--|--|--|--|--|
| 2269E | 0.98 | 0.97 | 0.97 | 0.96 | 0.99 | 1.00 | 1.00 | 0.98 | 1.00 | 0.99 | 0.99 | 0.98 | 0.99 | 0.90 | 0.95 | 1.00 |      |      |      |      |      |      |      |      |  |  |  |  |  |  |  |  |  |  |
| 2270  | 0.94 | 0.99 | 0.99 | 0.88 | 0.94 | 0.98 | 0.98 | 1.00 | 0.97 | 0.99 | 0.98 | 1.00 | 0.93 | 0.80 | 0.86 | 0.97 | 1.00 |      |      |      |      |      |      |      |  |  |  |  |  |  |  |  |  |  |
| 2271  | 0.98 | 0.97 | 0.97 | 0.96 | 0.99 | 0.99 | 1.00 | 0.98 | 1.00 | 0.99 | 0.99 | 0.97 | 0.99 | 0.91 | 0.95 | 1.00 | 0.97 | 1.00 |      |      |      |      |      |      |  |  |  |  |  |  |  |  |  |  |
| 2273  | 0.92 | 0.99 | 0.99 | 0.86 | 0.92 | 0.97 | 0.97 | 0.99 | 0.96 | 0.98 | 0.97 | 0.99 | 0.91 | 0.77 | 0.83 | 0.96 | 1.00 | 0.96 | 1.00 |      |      |      |      |      |  |  |  |  |  |  |  |  |  |  |
| 2274  | 0.88 | 0.98 | 0.99 | 0.82 | 0.88 | 0.95 | 0.95 | 0.98 | 0.94 | 0.96 | 0.94 | 0.99 | 0.88 | 0.71 | 0.79 | 0.93 | 0.99 | 0.93 | 0.99 | 1.00 |      |      |      |      |  |  |  |  |  |  |  |  |  |  |
| 2275  | 0.97 | 0.98 | 0.98 | 0.91 | 0.97 | 0.98 | 0.98 | 0.99 | 0.98 | 0.98 | 0.99 | 0.98 | 0.96 | 0.87 | 0.91 | 0.98 | 0.98 | 0.98 | 0.97 | 0.95 | 1.00 |      |      |      |  |  |  |  |  |  |  |  |  |  |
| 2276A | 0.87 | 0.98 | 0.98 | 0.79 | 0.86 | 0.93 | 0.93 | 0.97 | 0.92 | 0.95 | 0.93 | 0.98 | 0.86 | 0.68 | 0.75 | 0.91 | 0.98 | 0.91 | 0.99 | 0.99 | 0.94 | 1.00 |      |      |  |  |  |  |  |  |  |  |  |  |
| 2276B | 0.92 | 0.99 | 1.00 | 0.87 | 0.93 | 0.98 | 0.98 | 0.99 | 0.97 | 0.98 | 0.97 | 1.00 | 0.92 | 0.78 | 0.84 | 0.96 | 1.00 | 0.96 | 1.00 | 0.99 | 0.97 | 0.99 | 1.00 |      |  |  |  |  |  |  |  |  |  |  |
| 2277B | 0.95 | 0.99 | 0.99 | 0.93 | 0.96 | 0.99 | 0.99 | 1.00 | 0.99 | 0.99 | 0.99 | 0.99 | 0.96 | 0.84 | 0.89 | 0.99 | 0.99 | 0.99 | 0.98 | 0.97 | 0.99 | 0.96 | 0.99 | 1.00 |  |  |  |  |  |  |  |  |  |  |
| 2279  | 0.97 | 0.98 | 0.98 | 0.93 | 0.98 | 0.99 | 0.99 | 0.99 | 0.99 | 0.99 | 0.99 | 0.98 | 0.97 | 0.88 | 0.93 | 0.99 | 0.98 | 0.99 | 0.97 | 0.95 | 0.99 | 0.93 | 0.97 | 0.99 |  |  |  |  |  |  |  |  |  |  |
| 2280  | 0.92 | 1.00 | 1.00 | 0.88 | 0.93 | 0.98 | 0.98 | 0.99 | 0.97 | 0.99 | 0.98 | 1.00 | 0.92 | 0.78 | 0.84 | 0.97 | 0.99 | 0.96 | 1.00 | 0.99 | 0.98 | 0.98 | 1.00 | 0.99 |  |  |  |  |  |  |  |  |  |  |
| 2282  | 0.95 | 0.99 | 1.00 | 0.91 | 0.96 | 0.99 | 0.99 | 1.00 | 0.99 | 1.00 | 0.99 | 1.00 | 0.96 | 0.83 | 0.89 | 0.99 | 0.99 | 0.99 | 0.99 | 0.98 | 0.99 | 0.96 | 0.99 | 1.00 |  |  |  |  |  |  |  |  |  |  |
| 2284A | 0.95 | 0.99 | 1.00 | 0.91 | 0.96 | 0.99 | 0.99 | 1.00 | 0.99 | 1.00 | 0.99 | 1.00 | 0.96 | 0.83 | 0.89 | 0.99 | 0.99 | 0.99 | 0.99 | 0.98 | 0.99 | 0.96 | 0.99 | 1.00 |  |  |  |  |  |  |  |  |  |  |
| 2284B | 0.93 | 0.99 | 1.00 | 0.88 | 0.93 | 0.98 | 0.98 | 1.00 | 0.97 | 0.98 | 0.98 | 1.00 | 0.93 | 0.79 | 0.84 | 0.97 | 0.99 | 0.97 | 1.00 | 0.99 | 0.98 | 0.99 | 1.00 | 0.99 |  |  |  |  |  |  |  |  |  |  |
| 2288  | 0.95 | 0.99 | 0.99 | 0.92 | 0.96 | 1.00 | 0.99 | 1.00 | 0.99 | 0.99 | 0.99 | 0.99 | 0.96 | 0.84 | 0.89 | 0.99 | 0.99 | 0.99 | 0.98 | 0.97 | 0.98 | 0.95 | 0.99 | 1.00 |  |  |  |  |  |  |  |  |  |  |
| 2289  | 0.89 | 0.99 | 0.99 | 0.84 | 0.89 | 0.96 | 0.96 | 0.98 | 0.95 | 0.97 | 0.96 | 0.99 | 0.89 | 0.72 | 0.79 | 0.94 | 0.98 | 0.94 | 0.99 | 0.99 | 0.96 | 0.99 | 0.99 | 0.98 |  |  |  |  |  |  |  |  |  |  |
| 2293  | 0.98 | 0.95 | 0.95 | 0.86 | 0.99 | 0.98 | 0.99 | 0.97 | 0.99 | 0.98 | 0.99 | 0.96 | 0.99 | 0.93 | 0.97 | 0.99 | 0.95 | 0.99 | 0.94 | 0.91 | 0.98 | 0.89 | 0.95 | 0.97 |  |  |  |  |  |  |  |  |  |  |
| 2293B | 0.97 | 0.85 | 0.85 | 0.96 | 0.97 | 0.92 | 0.92 | 0.89 | 0.94 | 0.90 | 0.93 | 0.86 | 0.97 | 0.98 | 1.00 | 0.94 | 0.86 | 0.95 | 0.83 | 0.79 | 0.92 | 0.75 | 0.84 | 0.89 |  |  |  |  |  |  |  |  |  |  |
| 2297  | 0.95 | 0.99 | 0.99 | 0.92 | 0.96 | 0.99 | 0.99 | 1.00 | 0.99 | 0.99 | 0.99 | 1.00 | 0.96 | 0.84 | 0.90 | 0.99 | 0.99 | 0.99 | 0.99 | 0.97 | 0.99 | 0.96 | 0.99 | 1.00 |  |  |  |  |  |  |  |  |  |  |
| 2300  | 0.94 | 1.00 | 1.00 | 0.91 | 0.95 | 0.99 | 0.99 | 1.00 | 0.98 | 0.99 | 0.99 | 1.00 | 0.95 | 0.82 | 0.88 | 0.98 | 0.99 | 0.98 | 0.99 | 0.98 | 0.99 | 0.97 | 0.99 | 1.00 |  |  |  |  |  |  |  |  |  |  |
| 2357  | 0.96 | 0.99 | 0.99 | 0.92 | 0.97 | 1.00 | 0.99 | 1.00 | 0.99 | 1.00 | 0.99 | 1.00 | 0.96 | 0.84 | 0.90 | 0.99 | 0.99 | 0.99 | 0.99 | 0.97 | 0.99 | 0.96 | 0.99 | 1.00 |  |  |  |  |  |  |  |  |  |  |
| 2358  | 0.90 | 0.99 | 0.99 | 0.83 | 0.90 | 0.96 | 0.96 | 0.98 | 0.94 | 0.97 | 0.96 | 0.99 | 0.89 | 0.74 | 0.79 | 0.94 | 0.98 | 0.94 | 0.99 | 0.99 | 0.97 | 0.99 | 0.99 | 0.97 |  |  |  |  |  |  |  |  |  |  |
| 2372  | 0.98 | 0.96 | 0.96 | 0.96 | 0.99 | 0.99 | 0.99 | 0.98 | 0.99 | 0.98 | 0.99 | 0.97 | 0.99 | 0.91 | 0.95 | 0.99 | 0.96 | 0.99 | 0.95 | 0.92 | 0.98 | 0.90 | 0.95 | 0.98 |  |  |  |  |  |  |  |  |  |  |
| 2374  | 0.99 | 0.91 | 0.92 | 0.95 | 0.98 | 0.96 | 0.96 | 0.95 | 0.97 | 0.95 | 0.97 | 0.93 | 0.98 | 0.95 | 0.97 | 0.97 | 0.93 | 0.98 | 0.91 | 0.88 | 0.97 | 0.85 | 0.91 | 0.95 |  |  |  |  |  |  |  |  |  |  |
| 2376  | 0.97 | 0.98 | 0.98 | 0.93 | 0.98 | 0.99 | 0.99 | 0.99 | 0.99 | 0.99 | 1.00 | 0.99 | 0.97 | 0.88 | 0.92 | 0.99 | 0.98 | 0.99 | 0.98 | 0.96 | 1.00 | 0.94 | 0.98 | 0.99 |  |  |  |  |  |  |  |  |  |  |
| 2414  | 0.95 | 0.99 | 0.99 | 0.92 | 0.96 | 0.99 | 0.99 | 1.00 | 0.99 | 0.99 | 0.99 | 0.99 | 0.96 | 0.85 | 0.90 | 0.99 | 0.99 | 0.99 | 0.98 | 0.97 | 0.99 | 0.96 | 0.99 | 1.00 |  |  |  |  |  |  |  |  |  |  |
| 2417  | 0.94 | 1.00 | 1.00 | 0.91 | 0.96 | 0.99 | 0.99 | 1.00 | 0.99 | 0.99 | 0.99 | 1.00 | 0.95 | 0.83 | 0.88 | 0.98 | 0.99 | 0.98 | 0.99 | 0.98 | 0.99 | 0.96 | 0.99 | 1.00 |  |  |  |  |  |  |  |  |  |  |
| 2426  | 0.95 | 0.99 | 0.99 | 0.90 | 0.95 | 0.99 | 0.99 | 1.00 | 0.98 | 0.99 | 0.99 | 1.00 | 0.95 | 0.82 | 0.88 | 0.98 | 1.00 | 0.98 | 0.99 | 0.98 | 0.98 | 0.97 | 0.99 | 0.99 |  |  |  |  |  |  |  |  |  |  |
| 2429A | 0.94 | 0.99 | 1.00 | 0.89 | 0.94 | 0.98 | 0.98 | 1.00 | 0.98 | 0.99 | 0.98 | 1.00 | 0.94 | 0.80 | 0.86 | 0.97 | 1.00 | 0.97 | 1.00 | 0.99 | 0.98 | 0.98 | 1.00 | 0.99 |  |  |  |  |  |  |  |  |  |  |
| 2429B | 0.96 | 0.98 | 0.99 | 0.92 | 0.96 | 0.99 | 0.99 | 1.00 | 0.99 | 0.99 | 0.99 | 0.99 | 0.96 | 0.85 | 0.90 | 0.98 | 0.99 | 0.99 | 0.99 | 0.97 | 0.99 | 0.96 | 0.99 | 0.99 |  |  |  |  |  |  |  |  |  |  |

Table 4. Cont.

[illegible]



[illegible]

**Table S5.** Numerical values obtained by classification using PLS-DA for samples seized in models M1 and M2.

| Seized sample | M1        | M2       |
|---------------|-----------|----------|
| 2160          | 0.802861  | 1.522480 |
| 2163          | -0.083072 | 0.185963 |
| 2167          | -0.082315 | 0.152725 |
| 2168          | -0.103678 | 0.127541 |
| 2174          | 0.087168  | 0.434644 |
| 2176          | -0.121217 | 0.117482 |
| 2177          | 0.072088  | 0.379310 |
| 2178          | 0.038394  | 0.366524 |
| 2180          | 0.034829  | 0.368271 |
| 2181A         | 0.019486  | 0.346670 |
| 2181B         | 0.392656  | 0.938611 |
| 2184A         | -0.007212 | 0.285882 |
| 2184B         | 0.583158  | 1.169147 |
| 2221          | 0.348716  | 0.850193 |
| 2177          | 0.072088  | 0.379310 |
| 2225          | 0.166466  | 0.519228 |
| 2228          | 0.579492  | 1.118258 |
| 2229          | 0.032015  | 0.317682 |
| 2230          | 0.490491  | 1.021487 |
| 2231          | 0.004094  | 0.294683 |
| 2232          | 0.094478  | 0.437063 |
| 2233          | 0.352130  | 0.801815 |
| 2234          | -0.079796 | 0.181403 |
| 2235          | 0.193738  | 0.557645 |
| 2236A         | -0.094149 | 0.168379 |
| 2236B         | -0.108634 | 0.149299 |
| 2237          | 0.388984  | 0.954159 |
| 2238A         | 0.144126  | 0.499034 |
| 2238B         | 0.009323  | 0.302126 |
| 2239          | -0.015867 | 0.258848 |
| 2240          | -0.043617 | 0.258870 |
| 2265          | 0.068775  | 0.396304 |
| 2266          | -0.038826 | 0.206105 |
| 2267          | 0.038593  | 0.356999 |
| 2269          | -0.092830 | 0.137142 |
| 2269B         | 0.106019  | 0.436478 |
| 2269C         | 0.260234  | 0.731861 |
| 2269D         | 0.126996  | 0.488243 |
| 2269E         | 0.020858  | 0.323033 |
| 2270          | -0.057336 | 0.255391 |
| 2271          | 0.038380  | 0.362106 |
| 2273          | -0.102226 | 0.169420 |
| 2274          | -0.158122 | 0.057466 |
| 2275          | -0.089185 | 0.151923 |
| 2276A         | -0.125673 | 0.090764 |
| 2276B         | -0.084535 | 0.182895 |
| 2277B         | -0.035327 | 0.259562 |
| 2279          | -0.067703 | 0.236849 |
| 2280          | -0.095963 | 0.174937 |
| 2282          | -0.046389 | 0.255246 |
| 2284A         | -0.046389 | 0.255246 |
| 2284B         | -0.033239 | 0.246154 |
| 2288          | -0.048095 | 0.244623 |
| 2289          | -0.169627 | 0.051199 |
| 2293          | 0.014844  | 0.365987 |

|       |           |          |
|-------|-----------|----------|
| 2293B | 0.149126  | 0.560541 |
| 2297  | −0.055766 | 0.232340 |
| 2300  | −0.065817 | 0.219540 |
| 2357  | −0.014110 | 0.287086 |
| 2358  | −0.101535 | 0.095982 |
| 2372  | 0.059298  | 0.432811 |
| 2374  | 0.147040  | 0.502563 |
| 2376  | −0.024276 | 0.249570 |
| 2414  | −0.077333 | 0.204790 |
| 2417  | −0.078299 | 0.203609 |
| 2426  | −0.071601 | 0.197531 |
| 2429A | −0.043020 | 0.234559 |
| 2429B | −0.017761 | 0.273661 |

---
